# Supplementary figures and images for: The Multifaceted Role of EXOC6A in Ciliogenesis
Source: eLife journal article supplement (doi:10.7554/elife.108271), 2025-10-06

Figure 4—figure supplement 1C

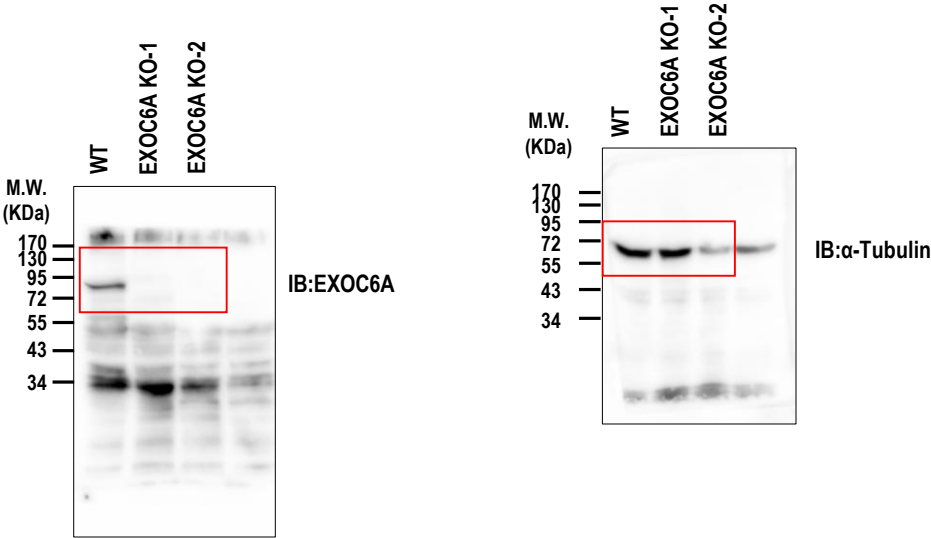

Supplement: fig4-figsupp1-data1 [file Figure 4-figure supplement 1-source data 1.pdf › Figure 4-figure supplement 1-source data 1.pdf]
